# Supplementary material for: Anomalous Raman scattering and lattice dynamics in mono- and few-layer WTe2
Source: Royal Society of Chemistry journal article supplement (doi:10.1039/c5nr06098b), 2015-12-23
Supplement: c5nr06098b1.pdf [file c5nr06098b1.pdf]

Supporting Information for

***Anomalous Raman scattering and lattice dynamics in  
mono- and few-layer WTe<sub>2</sub>***

Youngee Kim,<sup>‡</sup> Young In Jhon,<sup>‡</sup> June Park,<sup>‡</sup> Jae Hun Kim, Seok Lee,  
and Young Min Jhon\*

Sensor System Research Center, Korea Institute of Science and Technology,  
Seoul 136-791, Republic of Korea

<sup>‡</sup>These authors contributed equally to this work.

**Optical microscopy and AFM images of 5- to 13-layer WTe<sub>2</sub>**

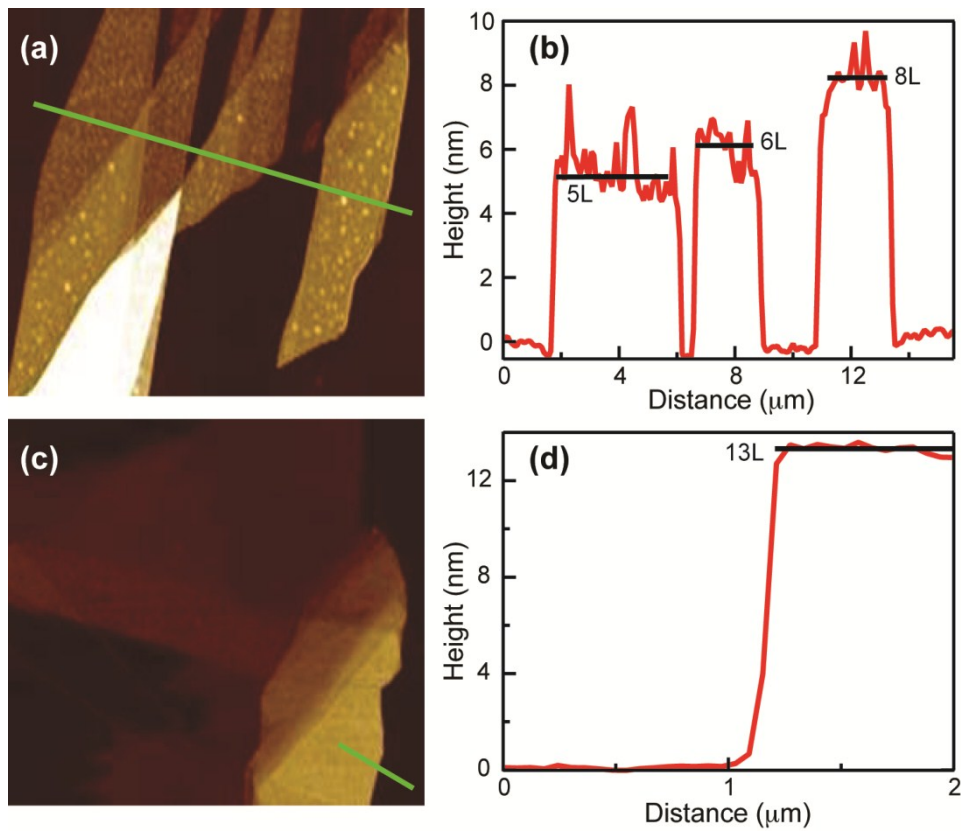

**Fig. S1.** (a, c) The optical microscopy images of WTe<sub>2</sub> flakes containing “5, 6, and 8 layers” and “13 layers”, respectively; (b, d) the AFM images of the WTe<sub>2</sub> flakes measured along the green solid lines in (a, c).

## Phonon spectra of bulk and mono- to tri-layer WTe<sub>2</sub>

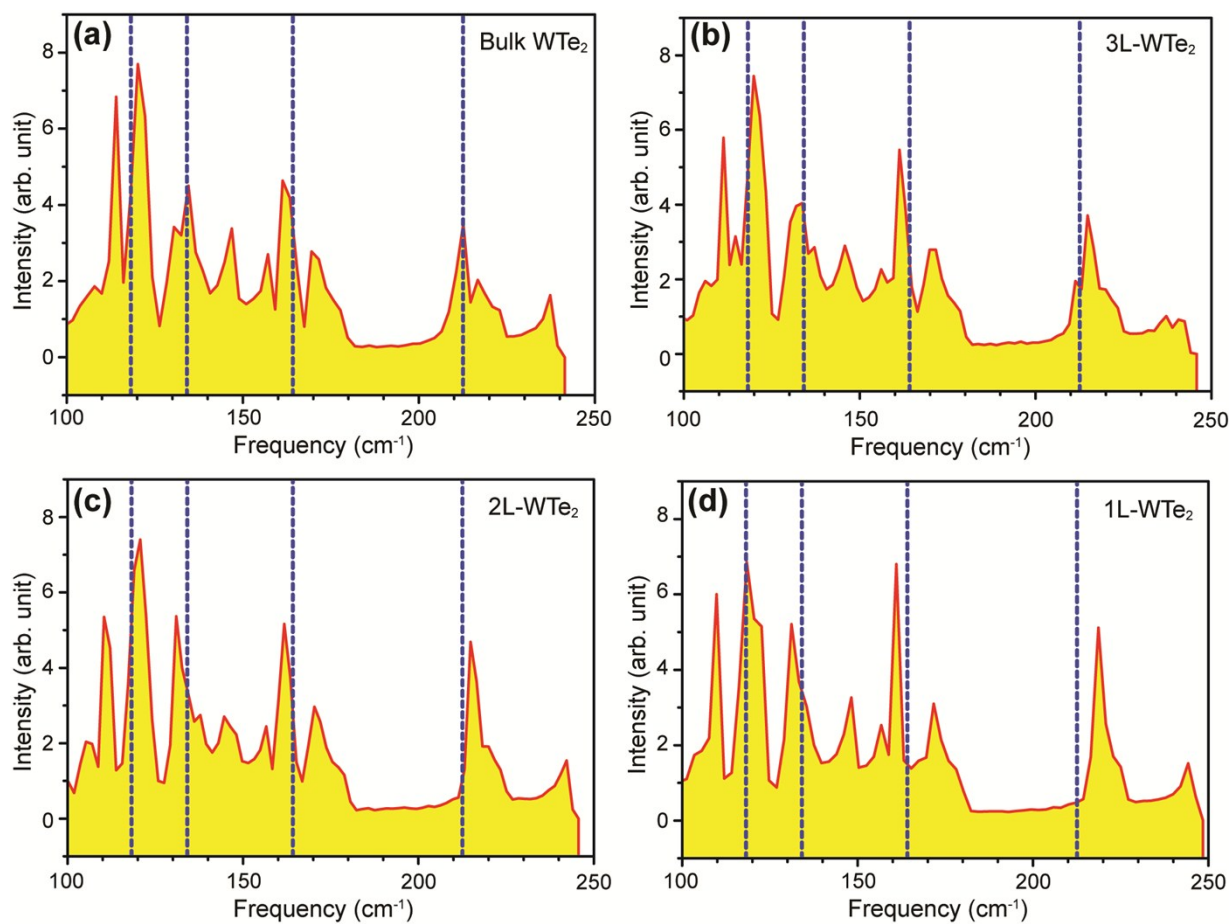

**Fig. S2.** Simulated Phonon spectra of (a) bulk, (b) tri-layer, (c), bi-layer, and (d) mono-layer WTe<sub>2</sub>. Blue dashed lines indicate lattice vibrational frequencies corresponding to Raman modes of bulk WTe<sub>2</sub> in experiments.

## Temporal degradation of trilayer WTe<sub>2</sub>

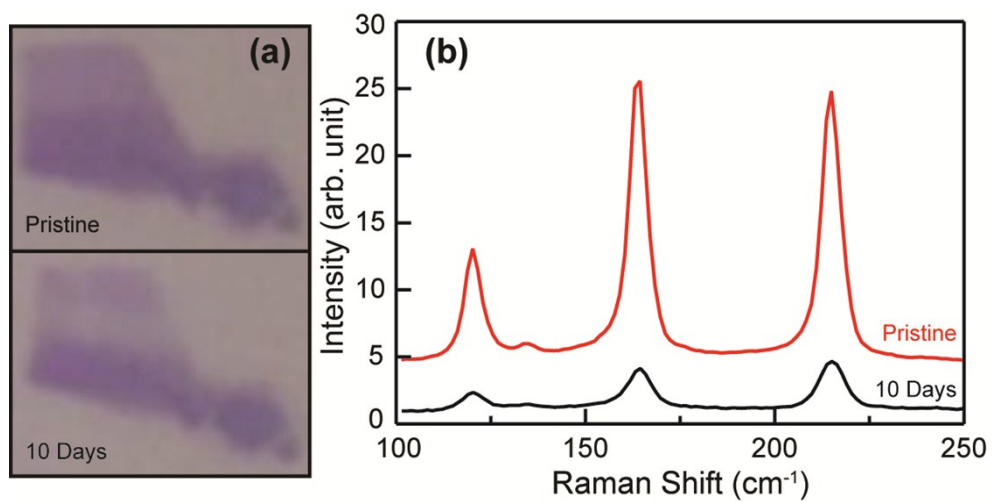

**Fig. S3.** (a) The optical microscopy images of trilayer WTe<sub>2</sub> obtained at sequential stages after its fresh deposition on Si/SiO<sub>2</sub> substrate. (b) The Raman spectra of trilayer WTe<sub>2</sub> measured on the center of degraded regions at the same sequential stages as in (a).
